# Supplementary material for: Fatal Neurotoxicosis in Dogs Associated with Tychoplanktic, Anatoxin-a Producing Tychonema sp. in Mesotrophic Lake Tegel, Berlin
Source: PubMed Central journal article supplement (PMC5848161; doi:10.3390/toxins10020060), 2018-01-31
Supplement: toxins-10-00060-s001.pdf [file toxins-10-00060-s001.pdf]

# Supplementary Materials: Fatal Neurotoxicosis in Dogs Associated with Tycho planktic, Anatoxin-a Producing *Tychonema* sp. in Mesotrophic Lake Tegel, Berlin

Jutta Fastner, Camilla Beulker, Britta Geiser, Anja Hoffmann, Roswitha Kröger, Kinga Teske, Judith Hoppe, Lars Mundhenk, Hartmud Neurath, Daniel Sagebiel and Ingrid Chorus

Table S1. Mass spectrometer parameters for the analytes monitored.

| Analyte                   | MRM transitions monitored ( $m/z$ ) | DP (V) | CE (V) |
|---------------------------|-------------------------------------|--------|--------|
| Anatoxin-a                | 166.1 > 149                         | 51     | 19     |
|                           | 166.1 > 131                         |        | 23     |
|                           | 166.1 > 91                          |        | 31     |
|                           | 166.1 > 43                          |        | 45     |
| Homoanatoxin-a            | 180.1 > 163                         | 51     | 25     |
|                           | 180.1 > 145                         |        | 25     |
| Dihydroanatoxin-a         | 168.0 > 150                         | 51     | 25     |
|                           | 168.0 > 133                         |        | 25     |
| Epoxyanatoxin-a           | 182.0 > 164                         | 51     | 25     |
|                           | 182.0 > 138                         |        | 25     |
| Dihydrohomoanatoxin-a     | 182.0 > 164                         | 51     | 25     |
|                           | 182.0 > 147                         |        | 25     |
| Epoxyhomoanatoxin-a       | 196.0 > 178                         | 51     | 25     |
|                           | 196.0 > 138                         |        | 25     |
| Cylindrospermopsin        | 416.1 > 194                         | 105    | 48     |
|                           | 416.1 > 176                         |        | 48     |
| MC-LR                     | 995.5 > 135                         | 236    | 123    |
|                           | 995.5 > 213                         |        | 75     |
| MC-RR                     | 519.7 > 135                         | 121    | 42     |
|                           | 519.7 > 70                          |        | 129    |
| MC-YR                     | 1045.5 > 135                        | 121    | 129    |
|                           | 1045.5 > 213                        |        | 75     |
| [Asp <sup>3</sup> ]-MC-RR | 512.8 > 135                         | 141    | 35     |
|                           | 512.8 > 213                         |        | 45     |
| [Asp <sup>3</sup> ]-MC-LR | 981.5 > 135                         | 231    | 113    |
|                           | 981.5 > 213                         |        | 73     |
| MC-LF                     | 986.5 > 135                         | 166    | 97     |
|                           | 986.5 > 135                         |        | 71     |
| MC-LW                     | 1025.5 > 135                        | 176    | 101    |
|                           | 1025.5 > 213                        |        | 83     |
| MC-LA                     | 910.5 > 135                         | 31     | 95     |
|                           | 910.5 > 213                         |        | 69     |

DP: declustering potential, CE: collision energy.
